# Supplementary material for: Associations of Urinary Phytoestrogen Concentrations with Sleep Disorders and Sleep Duration among Adults
Source: MDPI journal article supplement (doi:10.3390/nu12072103), 2020-07-16
Supplement: s1 [file s1]

**Table 1.** The classifications of covariates.

| <b>Covariates</b>                             | <b>Classifications</b>                                                                                        |
|-----------------------------------------------|---------------------------------------------------------------------------------------------------------------|
| <b>Gender</b>                                 | Female; Male                                                                                                  |
| <b>Age (year)</b>                             | 18–39; 40–59; ≥60                                                                                             |
| <b>Marital status</b>                         | Never married/widowed/divorced/separated; Married/living with partner                                         |
| <b>Race</b>                                   | Mexican American; Non-Hispanic White; Non-Hispanic Black; Other Hispanic; Other race                          |
| <b>Occupation</b>                             | No work; Regular night or evening shift/rotating shift/other; Regular daytime schedule                        |
| <b>Family income/year</b>                     | \$20,000 and over; Below \$20,000                                                                             |
| <b>Educational level</b>                      | High school; Above high school; Below high school;                                                            |
| <b>Body mass index</b>                        | <18.5 kg/m <sup>2</sup> ; 18.5 to <25 kg/m <sup>2</sup> ; 25 to <30 kg/m <sup>2</sup> ; ≥30 kg/m <sup>2</sup> |
| <b>Smoked at least 100 cigarettes in life</b> | No; Yes                                                                                                       |
| <b>Had at least 12 alcohol drinks/year</b>    | No; Yes                                                                                                       |
| <b>Use of female hormones</b>                 | No; Yes                                                                                                       |
| <b>Physical activity</b>                      | Moderate; Vigorous; Other                                                                                     |
| <b>C-reactive protein (mg/dL)</b>             | Continuous                                                                                                    |
| <b>Caffeine intake (mg/d)<sup>a</sup></b>     | Continuous                                                                                                    |
| <b>Hypertension<sup>b</sup></b>               | No; Yes                                                                                                       |
| <b>Depressive symptoms<sup>c</sup></b>        | No; Yes                                                                                                       |
| <b>Diabetes<sup>d</sup></b>                   | No; Yes                                                                                                       |

<sup>a</sup> Caffeine intake was the mean dietary caffeine intake through two 24-h dietary data.

<sup>b</sup> Participants whose mean diastolic (or systolic) blood pressure ≥80 (or ≥130) mmHg, or self-reported doctor diagnosis, or currently taking prescribed for high blood pressure were considered as having hypertension.

<sup>c</sup> Participants with the score of Patient Health Questionnaire-9 ≥10 were classified as having depressive symptoms.

<sup>d</sup> Diabetes was identified as self-reported doctor diagnosis.
